# Supplementary material
Source: PubMed Central journal article supplement (PMC4421049)
Supplement: AEM.00707-15_zam999116286so1.pdf [file AEM.00707-15_zam999116286so1.pdf]

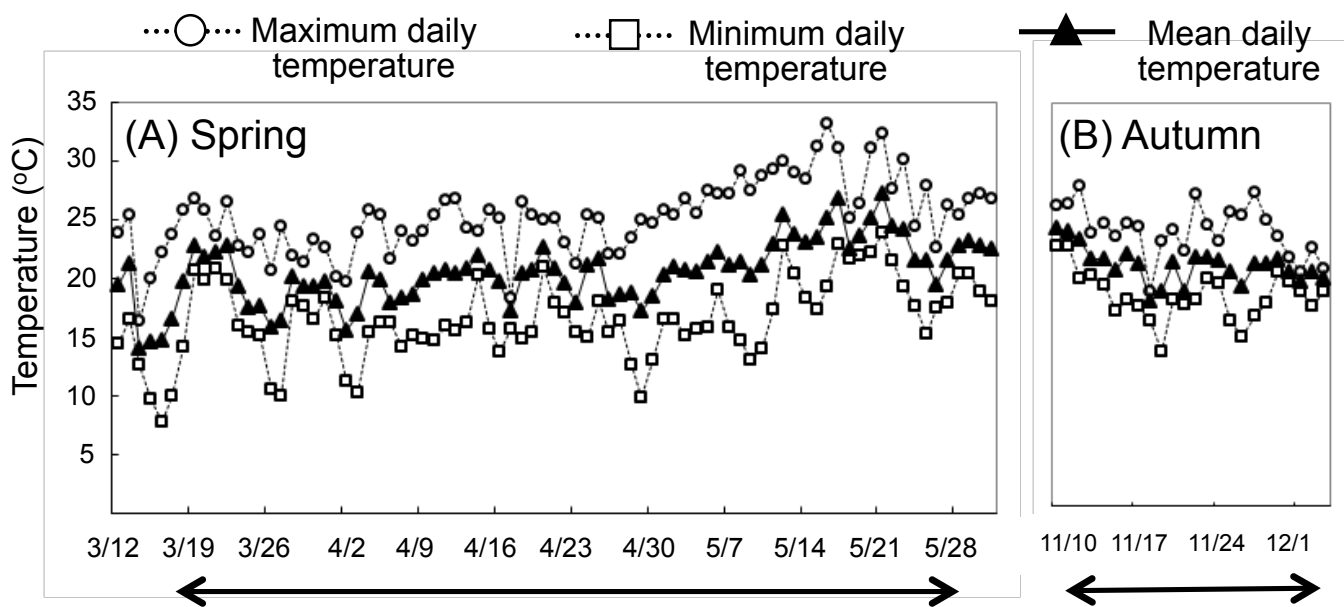

FIG S1 Minimum, maximum and mean daily temperatures measured at the tree no. 1. (A) In Spring 2009. (B) In Autumn 2009. Double-headed arrows indicate the sampling periods from 19 March to 28 May in spring (A) and from 12 November to 2 December in autumn (B). During the study periods, minimum, maximum, and mean daily temperatures ranged from 9.8°C to 23.9°C, 18.3°C to 33.2°C, and 15.5°C to 27.3°C in spring, and 13.5°C to 20.3°C, 18.7°C to 27.8°C, and 17.9°C to 23.2°C in autumn, respectively.

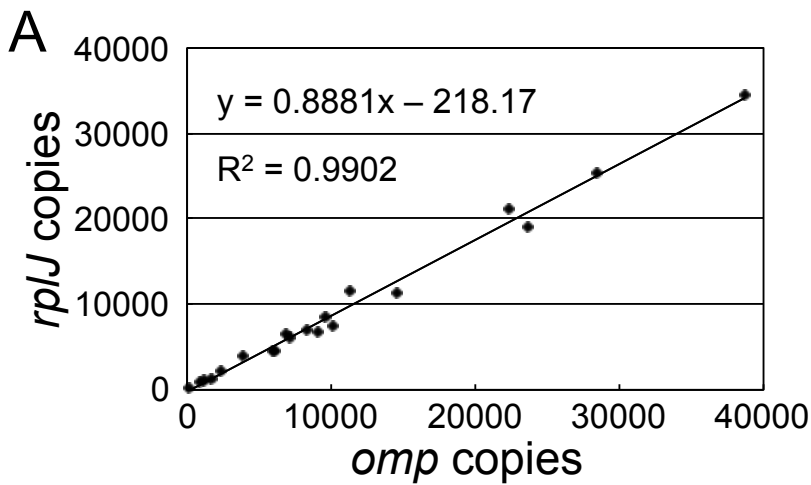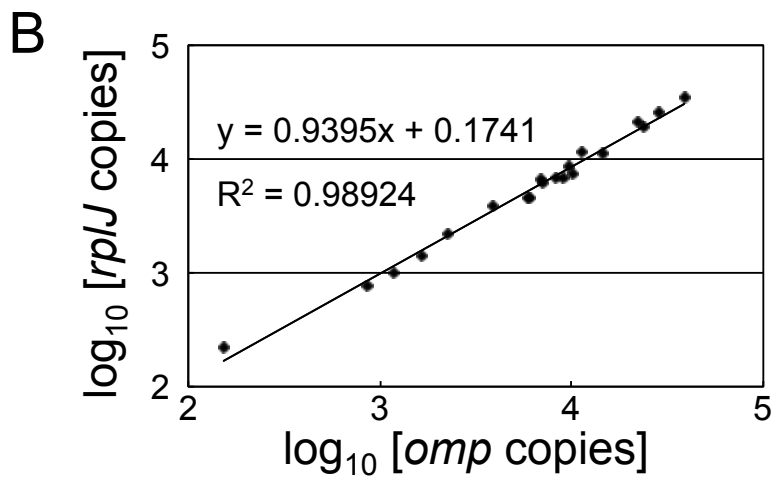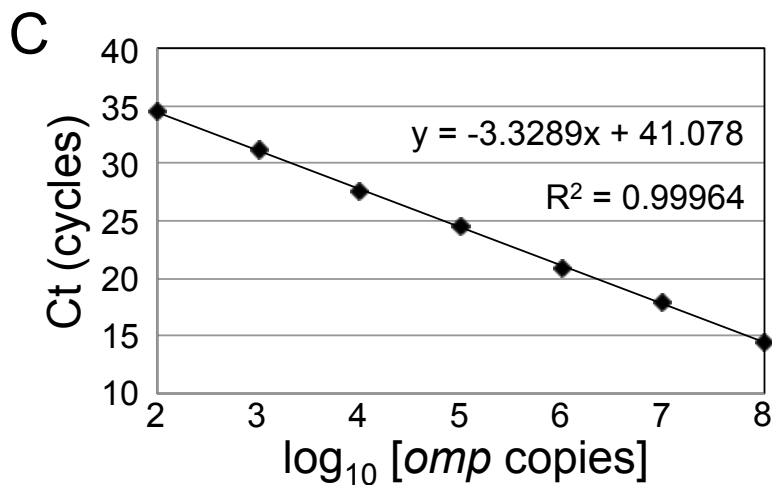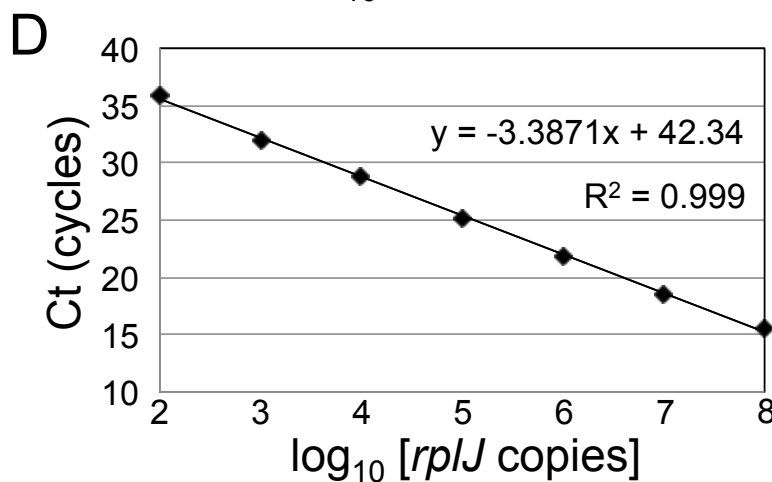

FIG S2 Evaluation and calibration of quantitative PCR for measuring Las gene copies. (A) Standard regression between *omp* gene copies and *rplJ* gene copies. (B) Log-transformed regression between *omp* gene copies and *rplJ* gene copies. (C) Standard curve for quantification of *omp* gene copies. (D) Standard curve for quantification of *rplJ* gene copies. Twenty field-collected adult insects were individually subjected to DNA extraction, and analyzed by quantitative PCR targeting *omp* and *rplJ* genes of Las.

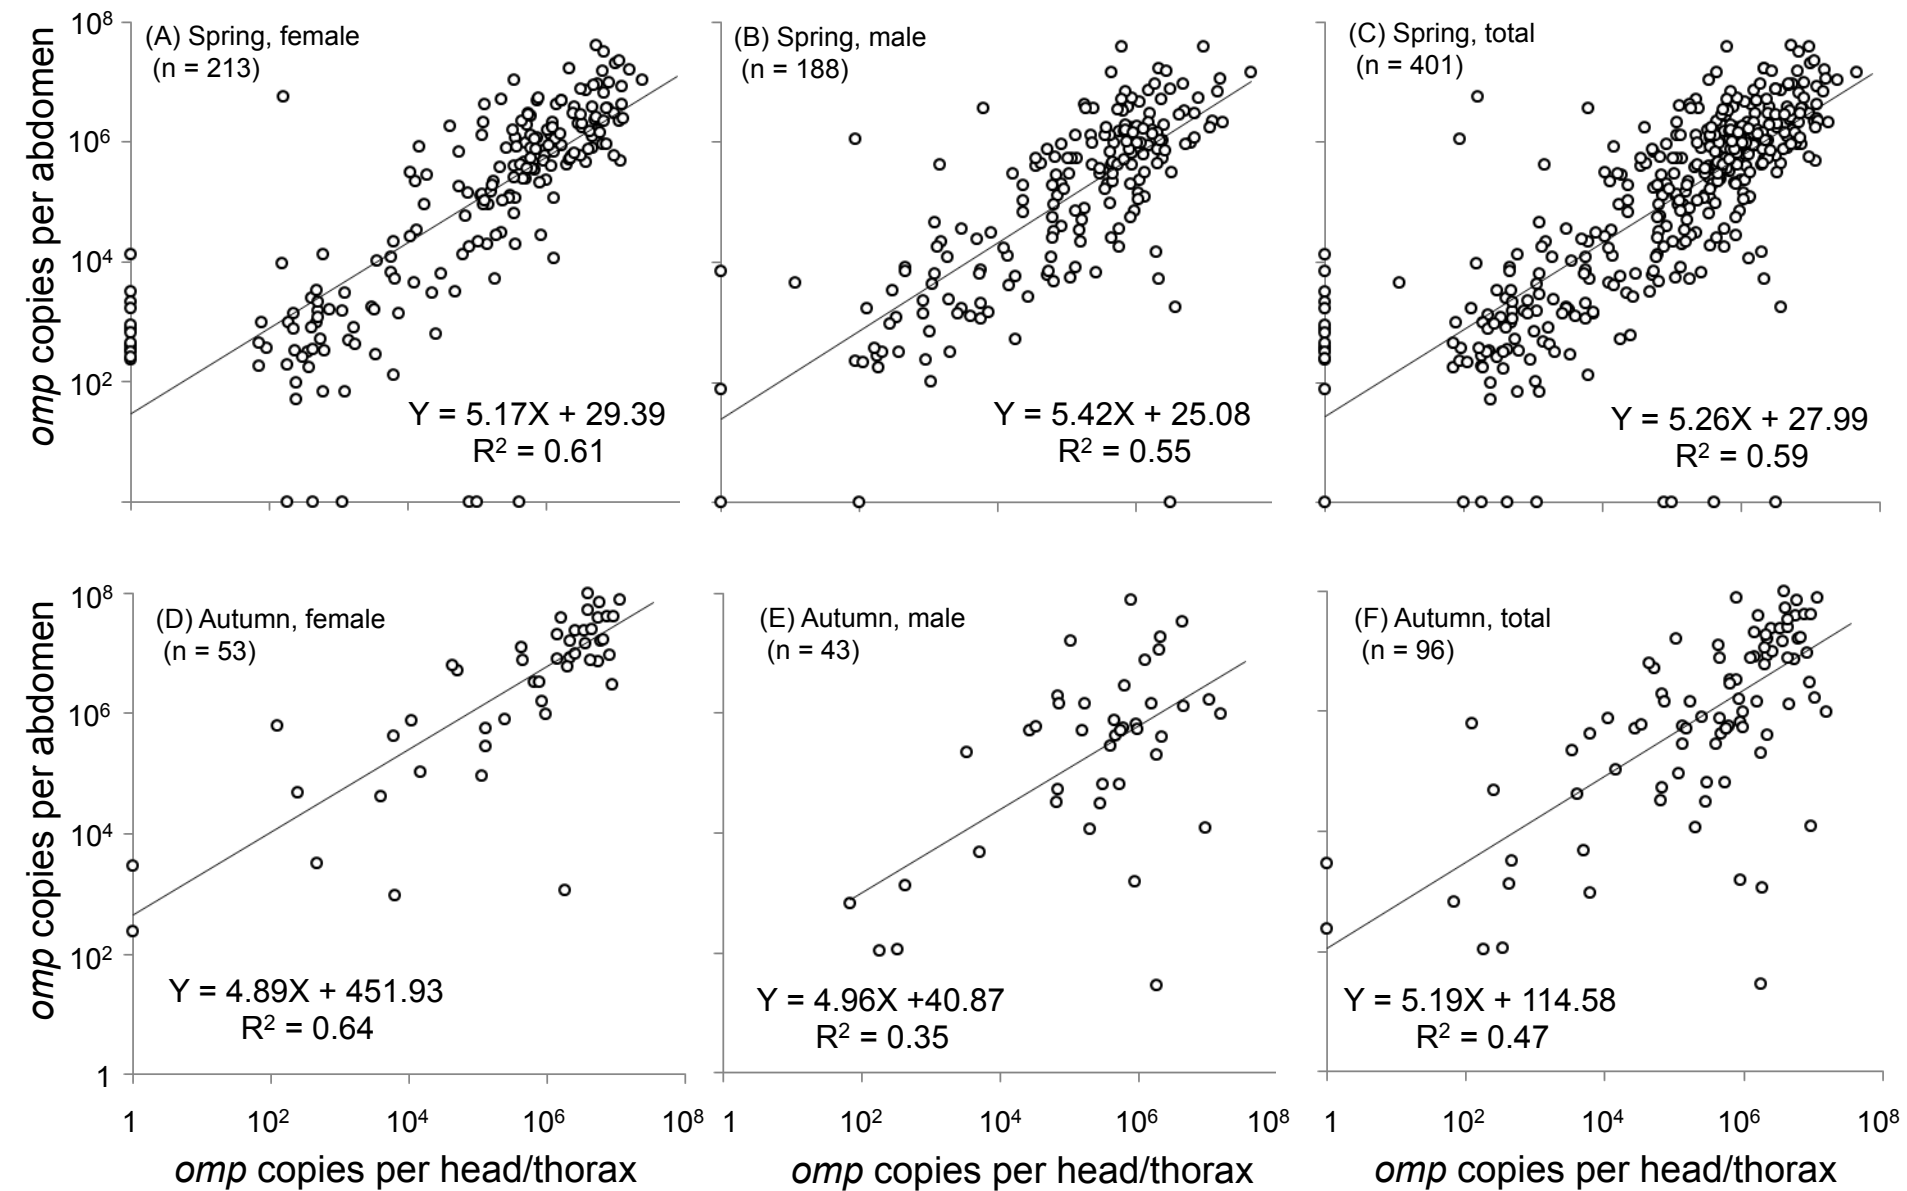

FIG S3 Relationship of Las infection densities between head-thorax and abdomen of *D. citri*. (A) Adult females in spring. (B) Adult males in spring. (C) All insects in spring. (D) Adult females in autumn. (E) Adult males in autumn. (F) All insects in autumn.

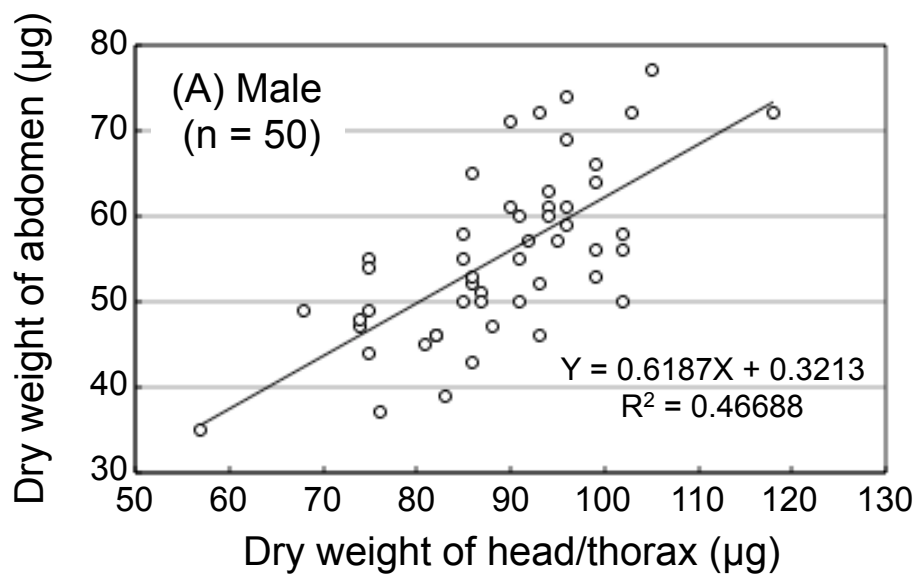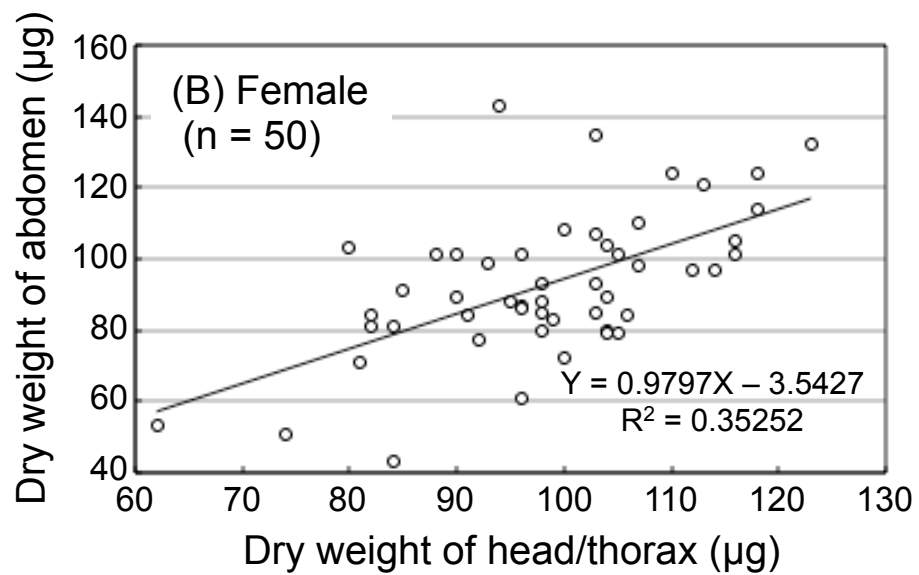

FIG S4 Relationship between biomass of head-thorax and biomass of abdomen in *D. citri*. (A) Adult males. (B) Adult females.

TABLE S1 Las infection status of *D. citri* collected from Las-infected *C. depressa* trees.

| Collection date | Trees             |                    |                  |                  | Total              |
|-----------------|-------------------|--------------------|------------------|------------------|--------------------|
|                 | No. 1             | No. 2              | No. 3            | No. 4            |                    |
| Spring 2009     |                   |                    |                  |                  |                    |
| 3/19            | 100%<br>(5/5)     | 100%<br>(3/3)      | –                | –                | 100%<br>(8/8)      |
| 3/26            | 100%<br>(4/4)     | 100%<br>(1/1)      | 100%<br>(2/2)    | –                | 100%<br>(7/7)      |
| 4/2             | 100%<br>(8/8)     | 100%<br>(6/6)      | 100%<br>(1/1)    | –                | 100%<br>(15/15)    |
| 4/9             | 100%<br>(2/2)     | 100%<br>(1/1)      | –                | –                | 100%<br>(3/3)      |
| 4/16            | 100%<br>(3/3)     | 100%<br>(1/1)      | –                | –                | 100%<br>(4/4)      |
| 4/22            | 100%<br>(27/27)   | 100%<br>(2/2)      | –                | 100%<br>(1/1)    | 100%<br>(30/30)    |
| 4/30            | 100%<br>(21/21)   | –                  | –                | 100%<br>(19/19)  | 100%<br>(40/40)    |
| 5/7             | 100%<br>(14/14)   | 100%<br>(27/27)    | –                | 85.3%<br>(5/6)   | 97.8%<br>(46/47)   |
| 5/14            | 100%<br>(40/40)   | 100%<br>(61/61)    | 100%<br>(9/9)    | 100%<br>(4/4)    | 100%<br>(114/114)  |
| 5/21            | 100%<br>(57/57)   | 94.1%<br>(16/17)   | –                | 100%<br>(21/21)  | 98.9%<br>(94/95)   |
| 5/28            | 100%<br>(29/29)   | –                  | 83.3%<br>(5/6)   | 100%<br>(6/6)    | 97.6%<br>(40/41)   |
| Total           | 100%<br>(210/210) | 99.2%<br>(118/119) | 94.4%<br>(17/18) | 98.2%<br>(56/57) | 99.3%<br>(401/404) |
| -----           |                   |                    |                  |                  |                    |
| Autumn 2009     |                   |                    |                  |                  |                    |
| 11/12           | 100%<br>(12/12)   | –                  | –                | –                | 100%<br>(12/12)    |
| 11/19           | 100%<br>(17/17)   | –                  | –                | –                | 100%<br>(17/17)    |
| 11/25           | 100%<br>(41/41)   | –                  | –                | –                | 100%<br>(41/41)    |
| 12/3            | 100%<br>(26/26)   | –                  | –                | –                | 100%<br>(26/26)    |
| Total           | 100%<br>(96/96)   | –                  | –                | –                | 100%<br>(96/96)    |
| -----           |                   |                    |                  |                  |                    |
| Grand total     | 100%<br>(306/306) | 99.2%<br>(118/119) | 94.4%<br>(17/18) | 98.2%<br>(56/57) | 99.4%<br>(497/500) |

TABLE S2 Las transmission rate to healthy citrus seedlings by *D. citri* collected from Las-infected *C. depressa* trees.

| Collection date | Trees            |                   |                |                 | Total            |
|-----------------|------------------|-------------------|----------------|-----------------|------------------|
|                 | No. 1            | No. 2             | No. 3          | No. 4           |                  |
| Spring 2009     |                  |                   |                |                 |                  |
| 3/19            | 0.0%<br>(0/5)    | 0.0%<br>(0/3)     | –              | –               | 0.0%<br>(0/8)    |
| 3/26            | 0.0%<br>(0/4)    | 0.0%<br>(0/1)     | 0.0%<br>(0/2)  | –               | 0.0%<br>(0/7)    |
| 4/2             | 0.0%<br>(0/8)    | 0.0%<br>(0/5)     | 0.0%<br>(0/1)  | –               | 0.0%<br>(0/14)   |
| 4/9             | 0.0%<br>(0/2)    | 100%<br>(1/1)     | –              | –               | 33.3%<br>(1/3)   |
| 4/16            | 0.0%<br>(0/3)    | 0.0%<br>(0/1)     | –              | –               | 0.0%<br>(0/4)    |
| 4/22            | 11.5%<br>(3/26)  | 50.0%<br>(1/2)    | –              | 0.0%<br>(0/1)   | 13.8%<br>(4/29)  |
| 4/30            | 15.0%<br>(3/20)  | –                 | –              | 16.7%<br>(3/18) | 15.8%<br>(6/38)  |
| 5/7             | 20.0%<br>(1/5)   | 19.2%<br>(5/26)   | –              | 20.0%<br>(1/5)  | 19.4%<br>(7/36)  |
| 5/14            | 5.0%<br>(2/40)   | 4.9%<br>(3/61)    | 0.0%<br>(0/9)  | 0.0%<br>(0/4)   | 4.4%<br>(5/114)  |
| 5/21            | 8.8%<br>(5/57)   | 11.8%<br>(2/17)   | –              | 0.0%<br>(0/21)  | 7.4%<br>(7/95)   |
| 5/28            | 6.9%<br>(2/29)   | –                 | 0.0%<br>(0/6)  | 0.0%<br>(0/6)   | 4.9%<br>(2/41)   |
| Total           | 8.0%<br>(16/199) | 10.3%<br>(12/117) | 0.0%<br>(0/18) | 7.3%<br>(4/55)  | 8.2%<br>(32/389) |
| -----           |                  |                   |                |                 |                  |
| Autumn 2009     |                  |                   |                |                 |                  |
| 11/12           | 25.0%<br>(3/12)  | –                 | –              | –               | 25.0%<br>(3/12)  |
| 11/19           | 0.0%<br>(0/17)   | –                 | –              | –               | 0.0%<br>(0/17)   |
| 11/25           | 7.3%<br>(3/41)   | –                 | –              | –               | 7.3%<br>(3/41)   |
| 12/3            | 11.5%<br>(3/26)  | –                 | –              | –               | 11.5%<br>(3/26)  |
| Total           | 9.4%<br>(9/96)   | –                 | –              | –               | 9.4%<br>(9/96)   |
| -----           |                  |                   |                |                 |                  |
| Grand total     | 8.5%<br>(25/295) | 10.3%<br>(12/117) | 0.0%<br>(0/18) | 7.3%<br>(4/55)  | 8.5%<br>(41/485) |
